# Supplementary material for: Effect of channel geometry on cell adhesion in microfluidic devices
Source: Royal Society of Chemistry journal article supplement (doi:10.1039/b813516a), 2008-11-21
Supplement: b813516a.pdf [file b813516a.pdf]

## SUPPLEMENTARY DATA

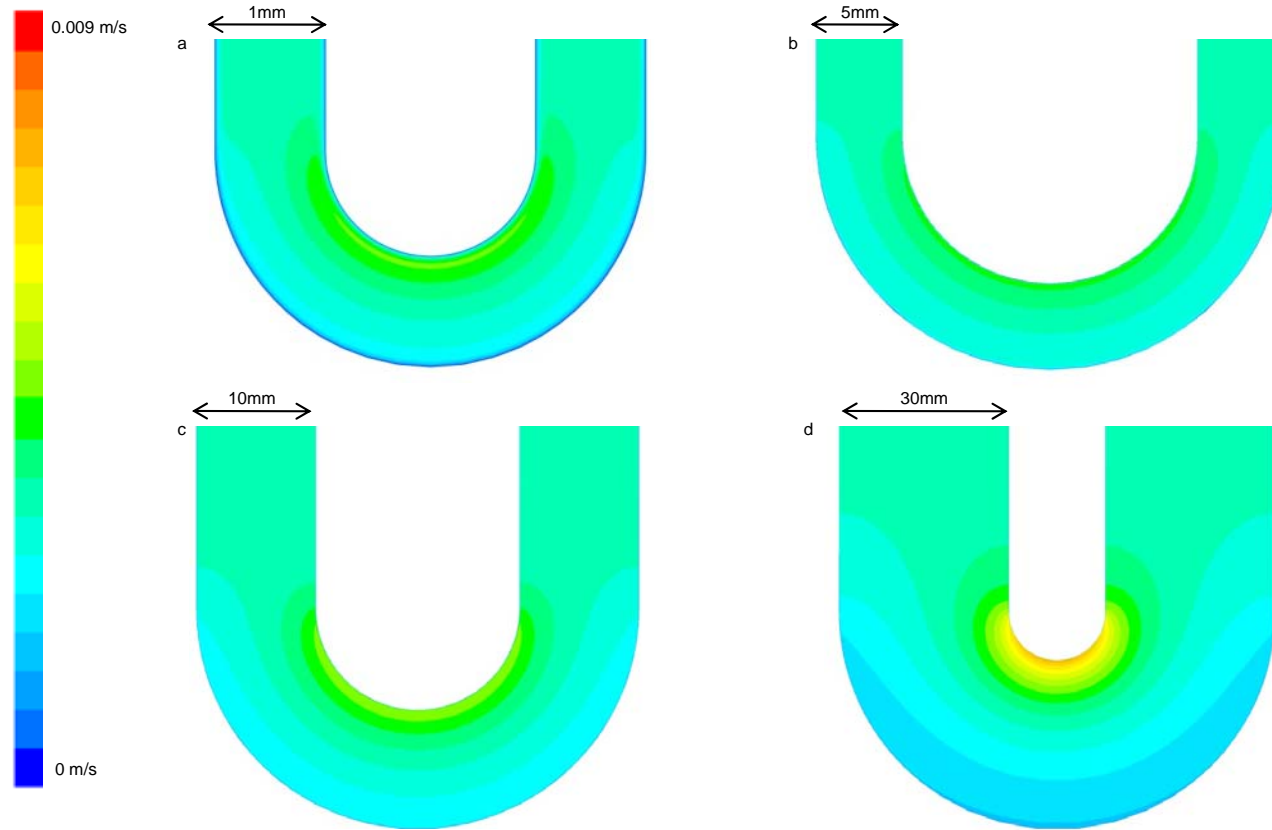

(Gap spacing: 1.9 mm; shear stress: 1.9 dyn/cm<sup>2</sup> for all four simulations)

**Figure S1.** CFD velocity profiles for curved-corner channels with 1.9 mm gap spacing between the vertical arms, 1.9 dyn/cm<sup>2</sup> shear stress, and varying channel widths. Images are not to scale relative to each other; however the velocity contours for all four channels are given by the single scale bar on the left.

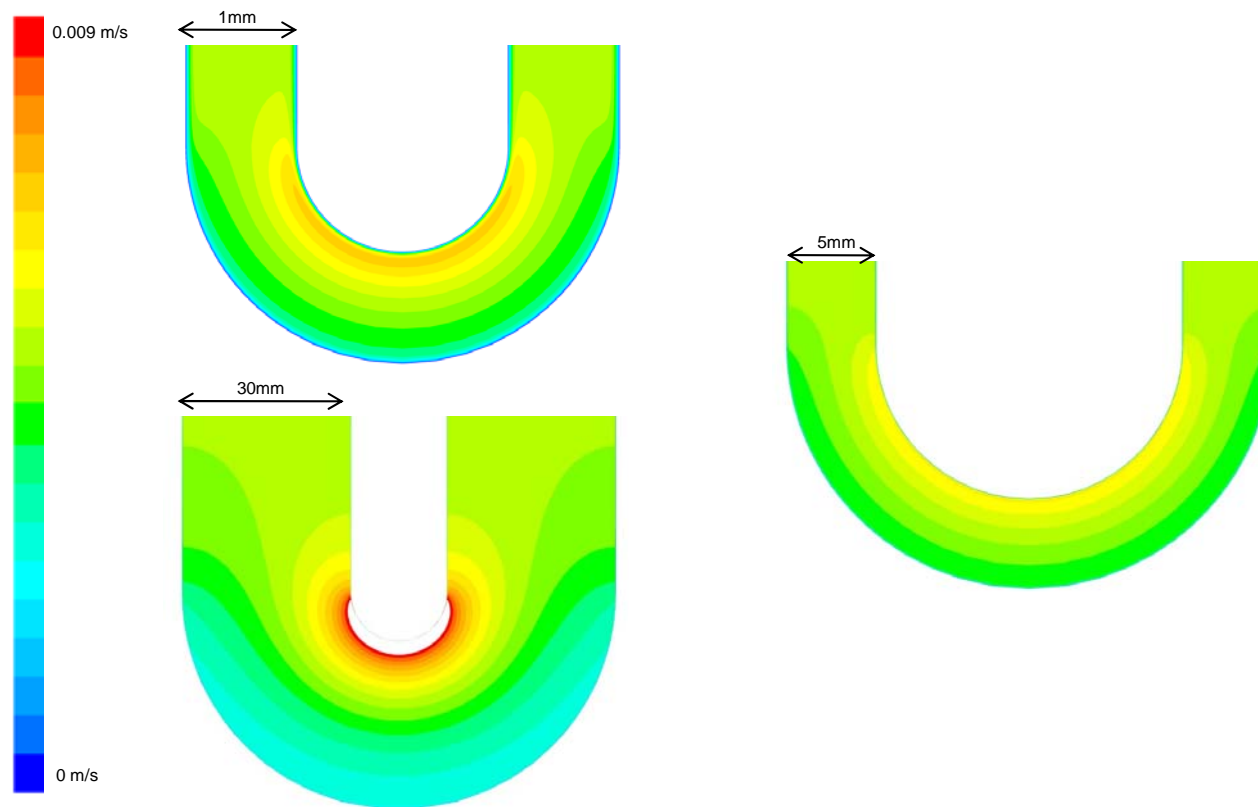

(Gap spacing: 1.9 mm; shear stress: 2.9 dyn/cm<sup>2</sup> for all three simulations)

**Figure S2-A.** CFD velocity profiles for curved-corner channels with 1.9 mm gap spacing between the vertical arms, 2.9 dyn/cm<sup>2</sup> shear stress, and varying channel widths. Images are not to scale relative to each other; however the velocity contours for all three channels are given by the single scale bar on the left. Note that regions that are white in color represent fluid velocities above 0.009 m/s.

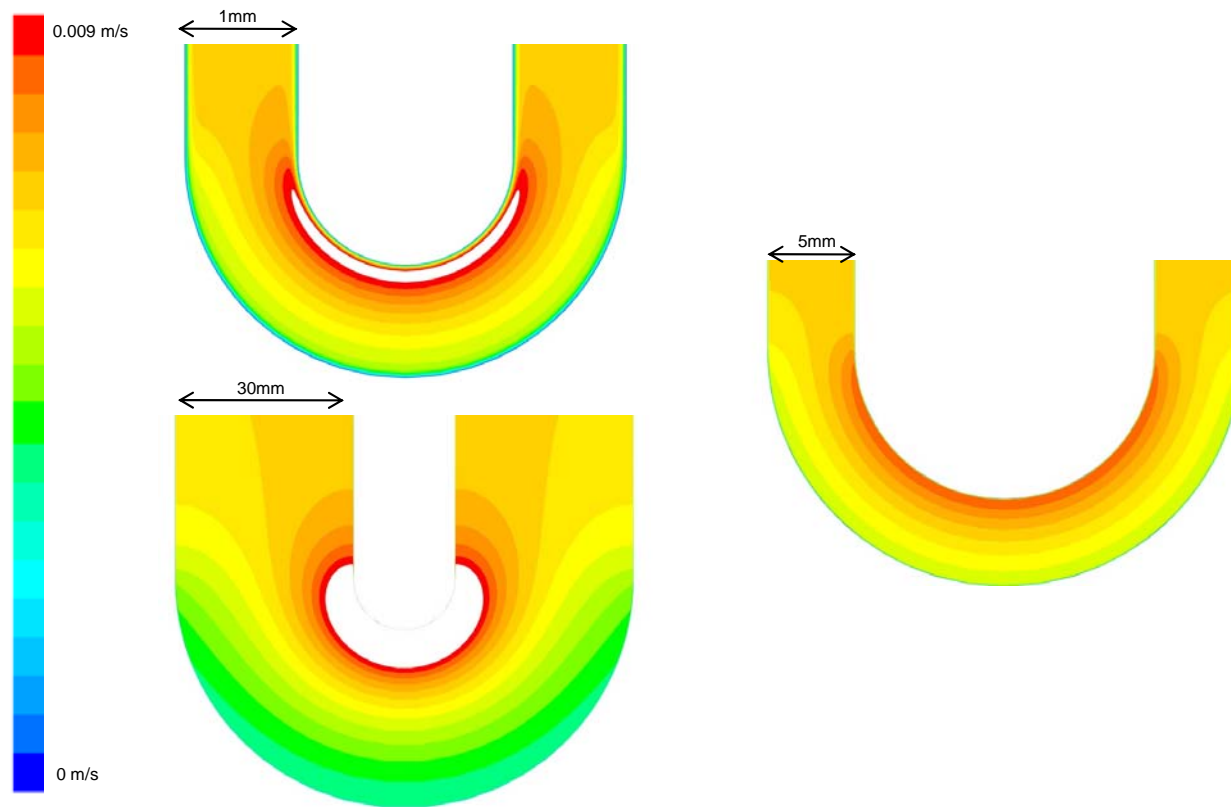

(Gap spacing: 1.9 mm; shear stress: 3.9 dyn/cm<sup>2</sup> for all three simulations)

**Figure S2-B.** CFD velocity profiles for curved-corner channels with 1.9 mm gap spacing between the vertical arms, 3.9 dyn/cm<sup>2</sup> shear stress, and varying channel widths. Images are not to scale relative to each other; however the velocity contours for all three channels are given by the single scale bar on the left. Note that regions that are white in color represent fluid velocities above 0.009 m/s.

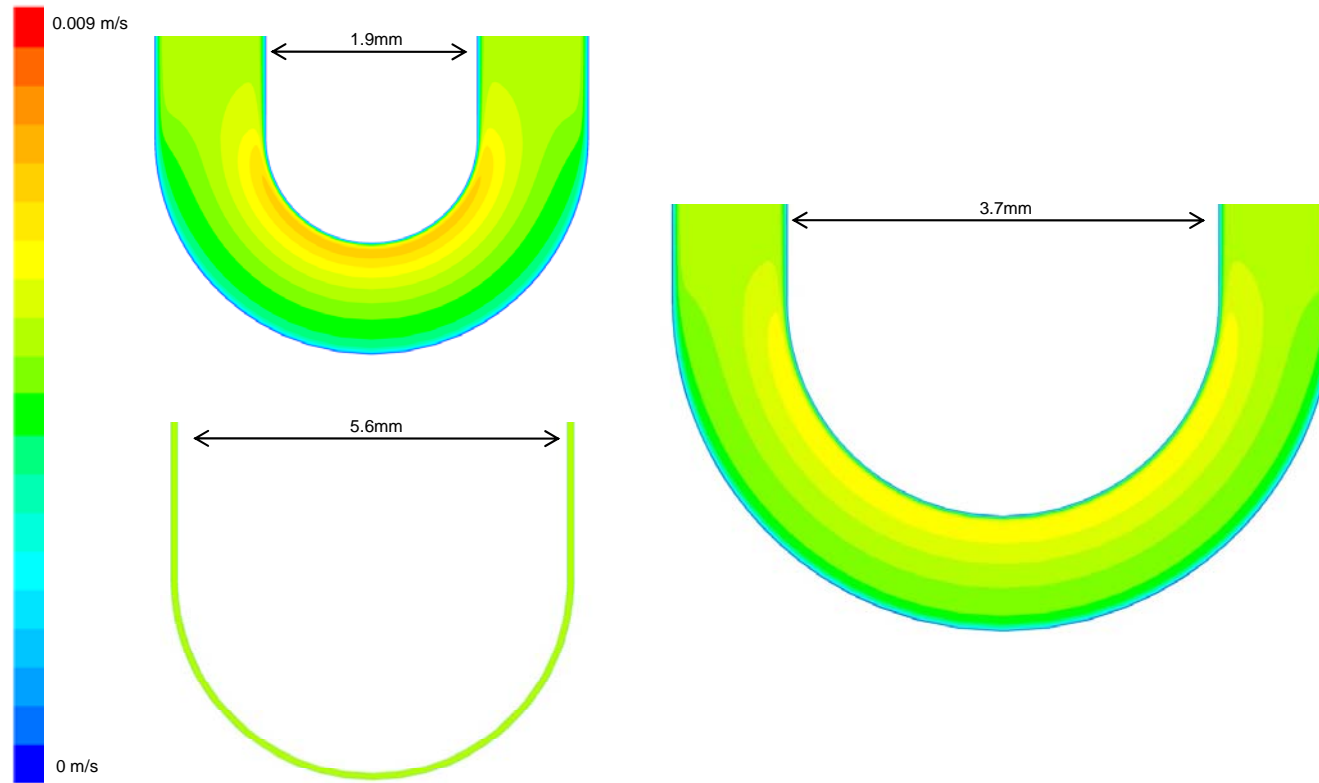

(Channel Width: 1 mm; shear stress: 2.9 dyn/cm<sup>2</sup> for all three simulations)

**Figure S3-A.** CFD velocity profiles for curved-corner channels with 1 mm channel width, 2.9 dyn/cm<sup>2</sup> shear stress, and varying gap spacings. Images are not to scale relative to each other; however the velocity contours for all three channels are given by the single scale bar on the left.

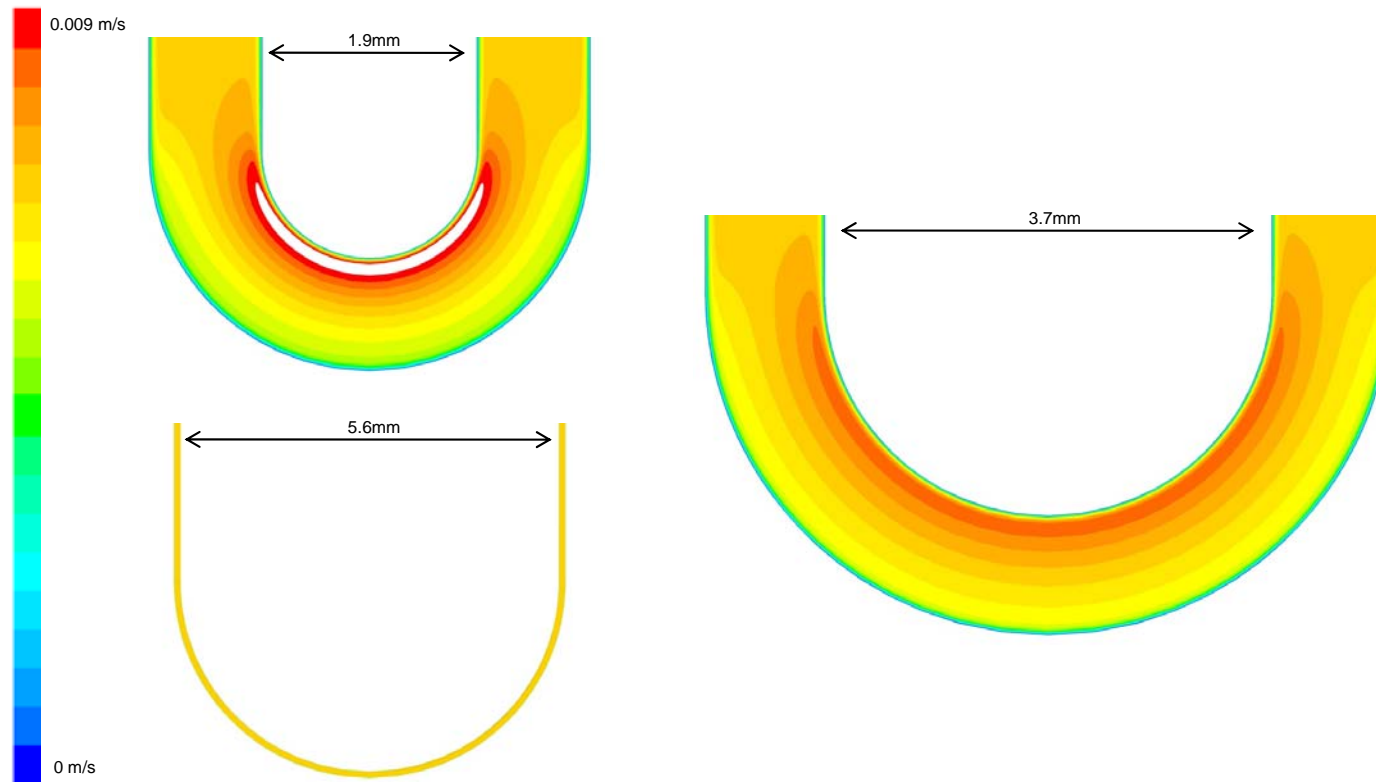

(Channel Width: 1 mm; shear stress: 3.9 dyn/cm<sup>2</sup> for all three simulations)

**Figure S3-B.** CFD velocity profiles for curved-corner channels with 1 mm channel width, 3.9 dyn/cm<sup>2</sup> shear stress, and varying gap spacings. Images are not to scale relative to each other; however the velocity contours for all three channels are given by the single scale bar on the left. Note that regions that are white in color represent fluid velocities above 0.009 m/s.
